# Supplementary material for: Cross-Amplification and Validation of SNPs Conserved over 44 Million Years between Seals and Dogs
Source: PLoS One. 2013 Jul 16;8(7):e68365. doi: 10.1371/journal.pone.0068365 (PMC3712990; doi:10.1371/journal.pone.0068365)
Supplement: Table S4 — Polymorphism characteristics of 173 clearly interpretable polymorphic SNPs in 24 Antarctic fur seals (see Results for details). The GenTrain score takes into account the quality, shape and degree of separation of the genotype clusters, with higher values indicating improved clustering [29]. P-values for deviation from HWE are shown without correction for multiple statistical tests. Values significant at P<0.05 are highlighted in bold, while those remaining significant after controlling for the false discovery rate are underlined. Twenty loci that were polymorphic but which could not be reliably scored are not included. (XLSX) [file pone.0068365.s005.xlsx]

## Sheet: Table S4
Locus name	Type	Chromosome in the dog	Position in the dog	Bpm address	GenTrain score	Call rate	Minor Allele Frequency (MAF)	Observed heterozygosity	Expected heterozygosity	Hardy-Weinberg equilibrium P-value
BICF2G63010447	[T/C]	X	94003056	40764487	0.8059	1	0.1042	0.0416667	0.190604	0.0071
BICF2G630115445	[A/G]	16	38022512	52602490	0.9244	1	0.0625	0.125	0.119679	1.0000
BICF2G630131208	[T/C]	37	28934970	61673381	0.7481	1	0.3542	0.291667	0.4672	0.0845
BICF2G630146011	[A/G]	27	19017153	12741336	0.841	1	0.0417	0.0833333	0.0815583	1.0000
BICF2G63014749	[A/G]	X	77686092	20652480	0.7605	1	0.0625	0.0416667	0.119679	0.0639
BICF2G630196686	[T/C]	26	38505527	26796504	0.7745	0.9583	0.2174	0.347826	0.347826	1.0000
BICF2G630212027	[T/A]	17	32801281	19618502	0.88	0.9583	0.0217	0.0434783	0.0434783	NA
BICF2G630314226	[A/G]	22	4403658	31602301	0.7845	1	0.0417	0.0833333	0.0815583	1.0000
BICF2G630323985	[T/G]	22	25253894	39731475	0.7772	1	0.4792	0.541667	0.50975	1.0000
BICF2G630326526	[A/G]	22	29509074	15770304	0.8304	1	0.0625	0.125	0.119679	1.0000
BICF2G630344078	[A/G]	3	62688040	32642476	0.7718	0.875	0.0714	0.047619	0.13589	0.0732
BICF2G6303589	[A/C]	X	115425815	23802374	0.8167	1	0.0417	0.625	0.0815583	0.0213
BICF2G630363601	[A/G]	23	52988940	41675470	0.6863	1	0.0208	0.0416667	0.0416667	NA
BICF2G630386428	[A/G]	23	16264959	66681447	0.7721	0.9583	0.2174	0.347826	0.347826	1.0000
BICF2G630401109	[A/G]	30	32325866	48699411	0.7587	1	0.2917	0.333333	0.421988	0.3456
BICF2G630446069	[T/C]	20	57393076	13807444	0.7731	1	0.1042	0.357143	0.190604	1.0000
BICF2G630452436	[A/G]	34	36240176	22704463	0.8687	1	0.0208	0.0416667	0.0416667	NA
BICF2G630501168	[A/C]	24	28360234	32684468	0.7336	1	0.4167	0.5	0.496454	1.0000
BICF2G630506697	[A/G]	24	18134185	44714370	0.7284	1	0.4167	0.583333	0.496454	0.4321
BICF2G630509599	[T/A]	24	14528853	23641310	0.6121	1	0.0833	0	0.156029	0.0014
BICF2G630510520	[A/G]	24	13377760	32666409	0.9139	1	0.1667	0.166667	0.283688	0.0901
BICF2G630510857	[T/C]	24	13093132	74621406	0.8532	1	0.0417	0.0833333	0.0815583	1.0000
BICF2G630530667	[A/G]	14	45014971	64698331	0.7448	1	0.1042	0.125	0.190604	0.2053
BICF2G630533274	[A/G]	X	26466195	44684326	0.712	1	0.4375	0.875	0.502658	0.0002
BICF2G630533403	[T/C]	X	26210260	64711392	0.7849	1	0.2292	0.291667	0.360817	0.5556
BICF2G630564528	[T/C]	7	65077876	58705375	0.7708	1	0.0833	0.166667	0.156029	1.0000
BICF2G630611629	[T/G]	13	21379696	55732378	0.7952	1	0.1875	0.208333	0.311171	0.1516
BICF2G630624166	[T/C]	29	25050557	72707304	0.8033	1	0.1458	0.208333	0.254433	0.3984
BICF2G630633970	[A/G]	29	38495196	53671510	0.7153	1	0.1875	0.375	0.311171	0.5510
BICF2G630649323	[A/G]	21	27853849	55725310	0.786	1	0.0625	0.125	0.119679	1.0000
BICF2G63066588	[T/C]	38	25887693	53808306	0.7749	0.875	0.4286	0.380952	0.501743	0.3776
BICF2G630700300	[T/C]	18	36153950	52672400	0.7203	1	0.1875	0.291667	0.311171	1.0000
BICF2G630708251	[A/G]	1	5324297	26764302	0.8312	1	0.0208	0.0416667	0.0416667	NA
BICF2G630709495	[A/G]	1	9868592	21643342	0.7858	1	0.1042	0.208333	0.190604	1.0000
BICF2G630735535	[A/G]	31	21758041	17725324	0.7586	1	0.3958	0.458333	0.488475	1.0000
BICF2G630794828	[T/C]	1	79799953	24795325	0.7751	1	0.0625	0.125	0.119679	1.0000
BICF2G630805987	[T/C]	26	13572406	44694372	0.8232	1	0.0833	0.166667	0.156029	1.0000
BICF2G630832509	[A/G]	9	31236960	19616372	0.7829	1	0.4583	0.583333	0.507092	0.6798
BICF2G63084504	[T/C]	7	70169366	35601364	0.8507	1	0.0833	0.166667	0.156029	1.0000
BICF2G63097386	[A/G]	25	31971819	19696498	0.6593	1	0.0833	0	0.156029	0.0014
BICF2G63099625	[A/G]	25	34032121	20607402	0.796	1	0.125	0.25	0.223404	1.0000
BICF2P1023290	[T/G]	13	53081590	72678312	0.7995	1	0.1042	0.208333	0.190604	1.0000
BICF2P1031521	[T/G]	16	13973653	74703315	0.8201	1	0.0625	0.125	0.119679	1.0000
BICF2P1045088	[T/G]	18	24676500	44683507	0.5061	0.9583	0.1087	0.0833333	0.231483	0.0077
BICF2P1051409	[A/G]	17	19131801	37656317	0.8136	1	0.0625	0.125	0.119679	1.0000
BICF2P1071566	[T/C]	22	44418722	53669494	0.8361	0.9583	0.2826	0.583333	0.438888	0.1266
BICF2P1071611	[A/G]	26	11224908	29600360	0.7063	1	0.2708	0.375	0.403371	1.0000
BICF2P1080627	[A/G]	17	29068829	25714421	0.7924	1	0.0208	0.0416667	0.0416667	NA
BICF2P1144428	[A/G]	23	45856072	35650474	0.7382	1	0.1667	0.25	0.283687	0.5010
BICF2P1197066	[A/C]	10	14098348	56655477	0.7951	1	0.1458	0.291667	0.254433	1.0000
BICF2P120569	[A/G]	32	15729277	71647325	0.8789	1	0.375	0.583333	0.478725	0.3914
BICF2P1221112	[A/G]	11	71128848	51634424	0.7581	1	0.375	0.416667	0.478725	0.6665
BICF2P1244041	[T/C]	10	61438911	48658390	0.7647	1	0.0625	0.125	0.119679	1.0000
BICF2P1253324	[A/G]	10	53189812	21747300	0.7471	1	0.0417	0.0833333	0.0815583	1.0000
BICF2P1254163	[T/G]	3	85067723	63735323	0.8361	1	0.0208	0.0416667	0.0416667	NA
BICF2P127668	[A/C]	4	16044458	14691398	0.7419	1	0.1667	0.333333	0.283687	1.0000
BICF2P128269	[A/G]	24	41388826	38636345	0.742	1	0.3125	0.458333	0.438829	1.0000
BICF2P1284163	[A/G]	22	10602943	53689484	0.8525	1	0.0625	0.125	0.119679	1.0000
BICF2P128530	[A/G]	31	38580765	41778366	0.7302	1	0.2292	0.375	0.360817	1.0000
BICF2P1302630	[T/C]	16	13800571	40685382	0.8259	1	0.0625	0.125	0.119679	1.0000
BICF2P1326919	[A/G]	4	68852230	13764325	0.7672	1	0.0417	0.0833333	0.0815583	1.0000
BICF2P1340261	[T/C]	25	21870333	46624368	0.7642	1	0.1458	0.208333	0.254433	0.3985
BICF2P1358869	[T/C]	25	14567472	53674301	0.7731	1	0.125	0.25	0.223404	1.0000
BICF2P1365573	[A/C]	12	40140660	55724460	0.7568	1	0.2083	0.333333	0.336879	1.0000
BICF2P1368521	[T/C]	7	83728850	59617465	0.7622	1	0.0625	0.125	0.119679	1.0000
BICF2P1389654	[A/G]	31	12116383	25755305	0.8144	1	0.3542	0.458333	0.4672	1.0000
BICF2P1392671	[A/G]	17	36074623	66747305	0.7619	1	0.0208	0.0416667	0.0416667	NA
BICF2P1423420	[A/G]	4	54209037	59689337	0.8036	1	0.125	0.166667	0.223404	0.2979
BICF2P1435673	[A/G]	5	12526871	62636337	0.7395	1	0.0417	0.0833333	0.0815583	1.0000
BICF2P145847	[C/G]	X	93617069	26653480	0.7897	1	0.0208	0.0416667	0.0416667	NA
BICF2P1458746	[T/C]	3	77186343	35645473	0.7906	1	0.1042	0.208333	0.190604	1.0000
BICF2P148867	[T/C]	24	25344139	74667430	0.733	1	0.4375	0.625	0.502658	0.4028
BICF2P1500513	[T/C]	28	20357544	40734446	0.7253	1	0.0833	0.166667	0.156029	1.0000
BICF2P161231	[A/G]	21	34504523	46684446	0.77	1	0.0417	0.0833333	0.0815583	1.0000
BICF2P167022	[A/G]	4	29096968	31682302	0.7983	1	0.0833	0.0833333	0.156029	1.0000
BICF2P175865	[A/G]	8	14606989	55726318	0.9159	1	0.1458	0.291667	0.254433	1.0000
BICF2P181911	[T/C]	7	53706526	23782497	0.8588	1	0.2292	0.291667	0.360817	0.5555
BICF2P185737	[A/G]	2	25870191	35796439	0.733	1	0.4583	0.5	0.507092	1.0000
BICF2P189591	[T/C]	X	13825337	10704501	0.7494	0.9583	0.1087	0.166667	0.231483	0.2147
BICF2P201440	[A/G]	11	26992470	62794430	0.6987	1	0.2708	0.375	0.403371	1.0000
BICF2P201637	[T/C]	8	53761754	67712486	0.8432	0.9583	0.1304	0.208333	0.263888	0.3098
BICF2P20413	[A/C]	38	18319322	73726322	0.7392	1	0.4792	0.541667	0.50975	1.0000
BICF2P224373	[A/T]	26	27339111	36724409	0.8369	1	0.1667	0.333333	0.283687	1.0000
BICF2P226127	[A/G]	15	5314304	64605445	0.809	1	0.25	0.416667	0.382979	1.0000
BICF2P283034	[T/C]	29	25680132	30603313	0.746	1	0.0625	0.0416667	0.119679	0.0639
BICF2P286007	[T/G]	15	5598877	72618510	0.6425	1	0.0625	0.0416667	0.119679	0.0638
BICF2P289666	[A/G]	7	29124162	43767480	0.6971	1	0.2083	0.333333	0.336879	1.0000
BICF2P306641	[A/G]	25	36600145	43636468	0.725	1	0.25	0.416667	0.382979	1.0000
BICF2P328308	[T/C]	33	25866623	29617407	0.7991	0.9583	0.2826	0.333333	0.438888	0.2992
BICF2P330428	[T/C]	X	40265651	27664428	0.8105	0.9583	0.5	0.166667	0.531483	0.0004
BICF2P351474	[T/G]	9	7656919	66632340	0.5936	1	0.0833	0.166667	0.156029	1.0000
BICF2P352715	[A/G]	24	47503660	57778400	0.6411	0.9583	0.3696	0.333333	0.49815	0.1715
BICF2P367624	[T/C]	1	41689204	34694386	0.8095	1	0.125	0.25	0.223404	1.0000
BICF2P381531	[T/C]	30	21828155	72796465	0.768	1	0.2917	0.5	0.421988	0.6210
BICF2P388183	[T/G]	25	17888918	43747476	0.7694	1	0.0833	0.166667	0.156029	1.0000
BICF2P398613	[A/G]	X	33481696	16652322	0.7875	1	0.3333	0.25	0.4539	0.0571
BICF2P409154	[A/C]	32	13315235	22746478	0.7743	1	0.0625	0.0416667	0.119679	0.0642
BICF2P410798	[A/C]	1	38802860	46786508	0.7249	1	0.2083	0.333333	0.336879	1.0000
BICF2P454720	[A/G]	33	27238634	21787304	0.7934	1	0.3542	0.375	0.4672	0.3904
BICF2P465294	[A/G]	4	60039175	51795510	0.9395	1	0.0625	0.125	0.119679	1.0000
BICF2P468526	[A/G]	2	61853641	56632464	0.7796	1	0.1042	0.125	0.190604	0.2055
BICF2P494153	[A/G]	36	13639067	22622493	0.7265	1	0.2708	0.541667	0.403371	0.1349
BICF2P510403	[A/G]	21	43322859	56755331	0.7935	1	0.1042	0.208333	0.190604	1.0000
BICF2P529855	[A/G]	37	20409684	27775415	0.5815	1	0.2708	0.0416667	0.403371	0.0000
BICF2P544269	[T/C]	38	26702466	67686419	0.7102	1	0.125	0.0833333	0.223404	0.0208
BICF2P560330	[T/C]	22	43591174	58778384	0.6178	0.9583	0.0652	0.166667	0.161113	1.0000
BICF2P604997	[A/G]	3	13949858	12735429	0.7074	1	0.1458	0.291667	0.254433	1.0000
BICF2P650398	[T/C]	26	38881067	38735337	0.7709	1	0.0625	0.125	0.119679	1.0000
BICF2P658873	[T/C]	7	30074612	43799375	0.8014	1	0.1042	0.208333	0.190604	1.0000
BICF2P66464	[T/C]	4	21358553	24760335	0.8323	1	0.4375	0.375	0.502658	0.2416
BICF2P694696	[A/G]	9	17220618	49718490	0.762	1	0.1875	0.291667	0.311171	1.0000
BICF2P709220	[T/C]	5	30956204	19724467	0.7528	1	0.0208	0.0416667	0.0416667	NA
BICF2P777506	[T/C]	34	44607102	37725338	0.7348	1	0.1042	0.208333	0.190604	1.0000
BICF2P791027	[A/G]	1	61157182	28729421	0.7963	1	0.0417	0.0833333	0.0815583	1.0000
BICF2P799645	[A/T]	4	65660910	52650464	0.7722	0.9583	0.0652	0.166667	0.161113	1.0000
BICF2P802400	[A/C]	4	32463712	40779482	0.5677	0.9167	0.0909	0.25	0.238371	1.0000
BICF2P882122	[A/G]	27	12342812	33637349	0.7893	1	0.1458	0.208333	0.254433	0.3982
BICF2P913077	[A/T]	16	26055209	26725433	0.8354	1	0.0417	0.0833333	0.0815583	1.0000
BICF2P945343	[A/G]	5	12776878	23724506	0.7658	1	0.0833	0.166667	0.156029	1.0000
BICF2P945533	[A/G]	5	54606497	72703354	0.7763	1	0.0625	0.125	0.119679	1.0000
BICF2P958430	[A/C]	31	16140423	46634430	0.7214	1	0.375	0.416667	0.478725	0.6667
BICF2P960982	[T/C]	1	104208642	58600302	0.7668	1	0.3542	0.208333	0.4672	0.0092
BICF2P969529	[T/C]	28	14146239	71737316	0.7842	1	0.1042	0.208333	0.190604	1.0000
BICF2P973029	[A/G]	X	21730993	32719335	0.8042	1	0.0625	0.125	0.119679	1.0000
BICF2P988773	[A/G]	18	33776979	47619453	0.6986	1	0.1042	0.208333	0.190604	1.0000
BICF2S22920466	[T/C]	27	23068179	22706300	0.7586	1	0.125	0.166667	0.223404	0.2981
BICF2S22921528	[A/G]	1	123110723	11728474	0.8215	1	0.0208	0.0416667	0.0416667	NA
BICF2S229680	[T/C]	5	42472747	45696306	0.798	1	0.1458	0.208333	0.254433	0.3984
BICF2S229846	[T/C]	X	4839712	71740483	0.7611	1	0.4375	0.625	0.502658	0.4024
BICF2S23019795	[T/G]	11	56529480	71618393	0.7531	1	0.2083	0.333333	0.336879	1.0000
BICF2S2303613	[A/G]	9	48993247	33716341	0.8367	1	0.0208	0.0416667	0.0416667	NA
BICF2S23038218	[A/G]	28	40865270	15772323	0.6958	1	0.1042	0.125	0.190604	0.2059
BICF2S23051169	[A/G]	29	39898922	68762510	0.7708	1	0.0208	0.0416667	0.0416667	NA
BICF2S23118188	[A/G]	8	72150308	33706306	0.827	1	0.0625	0.0416667	0.119679	0.0637
BICF2S2312046	[A/G]	20	55029182	53700307	0.6813	1	0.0208	0.0416667	0.0416667	NA
BICF2S23238383	[T/C]	11	42592504	60783346	0.723	1	0.5	0.5	0.510637	1.0000
BICF2S23247944	[A/G]	4	17241121	63733431	0.8783	1	0.25	0.333333	0.382979	0.5965
BICF2S23252668	[T/C]	8	46763105	25649507	0.7853	1	0.1875	0.291667	0.311171	1.0000
BICF2S23334536	[A/G]	38	11137944	52768377	0.6844	1	0.1667	0.333333	0.283687	1.0000
BICF2S2341646	[A/G]	1	55102355	73795451	0.7413	1	0.3333	0.333333	0.4539	0.3515
BICF2S23444402	[T/G]	23	54554181	55766421	0.8022	1	0.375	0.333333	0.478725	0.1940
BICF2S23522334	[T/C]	16	40254805	49604494	0.9001	1	0.3958	0.375	0.488475	0.3912
BICF2S23542057	[T/C]	9	15531913	38721323	0.7916	1	0.0833	0.0833333	0.156029	0.1262
BICF2S2364048	[A/G]	32	19159663	67709344	0.728	1	0.0833	0.166667	0.156029	1.0000
BICF2S2364690	[T/C]	13	53012910	73715369	0.8202	1	0.0625	0.125	0.119679	1.0000
BICF2S2365726	[T/C]	35	29006278	51701306	0.7912	1	0.2708	0.458333	0.403371	0.6357
BICF2S23710871	[T/C]	6	22460298	24753390	0.7589	1	0.2708	0.458333	0.403371	0.6358
BICF2S23712570	[A/G]	23	12768507	13640463	0.7864	1	0.0833	0.166667	0.156029	1.0000
BICF2S23723386	[T/C]	38	9869714	73678321	0.7997	1	0.2292	0.458333	0.360817	0.2890
BICF2S23732555	[T/C]	34	27245839	37679355	0.8967	1	0.1458	0.208333	0.254433	0.3984
BICF2S23735565	[A/G]	X	30111739	55684479	0.7007	1	0.2708	0.208333	0.403371	0.0290
BICF2S23739414	[A/G]	14	49405100	46623488	0.7208	1	0.2292	0.208333	0.360817	0.0627
BICF2S23748085	[T/C]	9	8717858	41638478	0.7852	1	0.0625	0.125	0.119679	1.0000
BICF2S2455249	[T/C]	31	33300705	15704438	0.8054	0.9583	0.413	0.583333	0.516667	0.6700
G2149f41S191	[A/C]	X	84907439	15810438	0.8461	1	0.0417	0	0.0815583	0.0212
TIGRP2P147556_rs8710700	[A/C]	11	15578748	61692378	0.7175	1	0.4167	0.833333	0.496454	0.0007
TIGRP2P156163_rs9042300	[A/G]	12	10848539	63793356	0.8361	1	0.0833	0.166667	0.156029	1.0000
TIGRP2P159485_rs9197272	[T/C]	12	21283728	54633441	0.763	1	0.0417	0.0833333	0.0815583	1.0000
TIGRP2P165245_rs9012451	[C/G]	12	45778078	71619331	0.6937	1	0.0208	0.0416667	0.0416667	NA
TIGRP2P166475_rs8575143	[A/G]	12	53153275	40722477	0.7056	1	0.3333	0.416667	0.4539	1.0000
TIGRP2P181034_rs9135796	[T/C]	13	6684479	63791470	0.756	1	0.3333	0.333333	0.4539	0.3517
TIGRP2P187155_rs9160086	[T/C]	14	17193405	11768412	0.7668	1	0.0833	0.166667	0.156029	1.0000
TIGRP2P216521_rs8707766	[G/C]	16	44638172	43747474	0.6421	1	0.0417	0.0833333	0.0815583	1.0000
TIGRP2P245937_rs8615377	[T/C]	18	25156223	51663367	0.878	1	0.1458	0.208333	0.254433	0.3984
TIGRP2P296506_rs9195422	[T/G]	22	55385021	63723302	0.8603	1	0.1458	0.208333	0.254433	0.3986
TIGRP2P31117_rs9095939	[A/G]	2	78687053	53734372	0.7262	1	0.0208	0.0416667	0.0416667	NA
TIGRP2P311510_rs9000469	[A/G]	24	15956286	56665321	0.7242	1	0.0208	0.0416667	0.0416667	NA
TIGRP2P316859_rs9103961	[T/G]	24	34337317	74614440	0.8066	1	0.2083	0.416667	0.336879	0.5396
TIGRP2P316903_rs8524601	[T/C]	24	34707486	54658452	0.7586	1	0.4375	0.458333	0.502658	0.6975
TIGRP2P343397_rs9187089	[A/G]	26	34053481	13607480	0.7551	1	0.125	0.25	0.223404	1.0000
TIGRP2P347039_rs9029912	[T/G]	26	9305262	73650385	0.6254	1	0.0417	0.0833333	0.0815583	1.0000
TIGRP2P361603_rs8725986	[T/C]	28	39341572	14676359	0.7898	1	0.125	0.25	0.223404	1.0000
TIGRP2P412400_rs8605990	[T/C]	36	19209623	21802494	0.8095	1	0.0208	0.0416667	0.0416667	NA
