# Supplementary material for: Cross-Amplification and Validation of SNPs Conserved over 44 Million Years between Seals and Dogs
Source: PLoS One. 2013 Jul 16;8(7):e68365. doi: 10.1371/journal.pone.0068365 (PMC3712990; doi:10.1371/journal.pone.0068365)
Supplement: Table S5 — Genotypes generated for five SNP loci using KASP assays in six dog and 24 Antarctic fur seal individuals. (XLSX) [file pone.0068365.s006.xlsx]

## Sheet: Table S5
Sample Name	Species	Locus
		BICF2G630131208	BICF2G630401109	BICF2G630501168	BICF2G630510520	BICF2G630735535
-	Negative control
-	Negative control
84538 dog	Domestic dog	AA	BB	AA	AB	BB
84548 dog	Domestic dog	AA	BB	AB	AB	BB
84553 dog	Domestic dog	BB	BB	BB	BB	BB
84557 dog	Domestic dog	BB	BB	AB	AB	AA
84580 dog	Domestic dog	AB	BB	AB	BB	BB
84583 dog	Domestic dog	BB	AA	AB	BB	BB
AGM10010	Antarctic fur seal	BB	BB		BB
AGM10012	Antarctic fur seal	AA			BB
AGM10013	Antarctic fur seal	AB			BB
AGM10017	Antarctic fur seal	BB			BB
AGM10018	Antarctic fur seal	AA			BB
AGM10019	Antarctic fur seal	AA			BB
AGM10020	Antarctic fur seal	BB	BB		AA
AGM10021	Antarctic fur seal	BB			BB
AGM10023	Antarctic fur seal	BB	BB		BB
AGF10001	Antarctic fur seal	BB			BB
AGF10002	Antarctic fur seal	BB	BB		AB
AGF10004	Antarctic fur seal	AB			AB
AGF10006	Antarctic fur seal	AB			BB
AGF10007	Antarctic fur seal	BB			AA
AGF10008	Antarctic fur seal	AA			BB
AGF10010	Antarctic fur seal	AB			BB
AGF10013	Antarctic fur seal	AA			BB
AGF10014	Antarctic fur seal	BB			BB
AGF10017	Antarctic fur seal	BB	BB		BB
AGF10019	Antarctic fur seal	BB	BB		BB
AGF10020	Antarctic fur seal	AB			BB
AGF10025	Antarctic fur seal	BB	BB		BB
AGP09003	Antarctic fur seal	AB			AB
AGP09043	Antarctic fur seal	AB			AB
